# Supplementary material
Source: PubMed Central journal article supplement (PMC3529008)
Supplement: NIHMS428609-supplement-S1.pdf [file NIHMS428609-supplement-S1.pdf]

**Supplemental Fig. S1****The partial genomic DNA sequence of one LINE-1 allele: Clone #18**

GTTCTAAAAGACCTGGAAAAATTGAATTACCAAAGAAGATCCAAAACGAA  
CTTCTTGAAGAGAGAACAACATGTTCTAAAGAACTGTGGCAGAATCCAA  
ATTTAATATTGAAACCGGCAGATAAGGGAAGAGCCCTAGTGATGATGAAC  
TCTGAATATTACAAGAAAGAAGTGGAAAGAAAAC TAGCAGATGAAGATAC  
CTATCTGCAAATTCATGAAAACCCACAGAAAAAATCCAGAAATTAATCA  
AACTATATTGGACGAAGCAGAAAATGATGAATTAATTAGTCATCACACC  
AAACATTTCTTGATGAATGCACATCCATCGGTTCCAATTATATATATAAT  
CCCGAAAGTGCACAAGAACTTAATTAATCCGCCAGGCAGACCCATCATTG  
CAGCGAACAATAGGGTGCTGGAACCATTAGCACAATATATAGATCGAGCA  
ATTCAACCCCTAACTCAGAAATGTAGAACCACATTAAAGACACCAATGA  
CTTTCTGAACAAATTGAACTCAATCGAAATTAATGAAGAGCAAGCTATCC  
TCTTTACAATGGACGTCGTAAGTTTGTACACAAACATCACCCATGAAGGG  
GGTTTAGAAGCCATGGAATGGCTTCTGTTGAAACCTGATTCAAATTGTGG  
AGCTGATAAATTGTTTCATCCTAAAACCTGTTGAAGATTGTA CTGCAGAACA  
ACCTCTTCATGTTTGAAGAGAAATACTTCATACAAACATCGGGAACATCA  
ATGGGGGCCGCGATGGCCCCAAGCTATGCAACCACATACATGGCTTATTT  
GGAAGAACTAACATCTTTAATGATGCAAGATGGACTGAACAAC TCAAAT  
GTATCTACAGATTCATTGAGGACATATTTGGTATTTGGTGGGGCTCACAT  
GAAGA ACTGGACACATTTTTTCAACATCTGAATCAAATGGCACCAAGGCT  
CAGACTAATATCAAAAACAAGCAAAGAAACAATAGAATTTTTTGGATGTAC  
AAATATATAAGAAAAGAGGGAAATTTGGAGACAACCATATACACAAAAGAA  
ACAGACAGAAACAGCATATTTGCATGCCAGCAGCTTTCATCCTAAAAAAC  
TG TAGAAAGCATAACCATTCAGTCAATTTCTAAGATATAGAAGAATCATAT  
CGGAAGAATCTGAATACATTA AAAAATCACGAGATCTGAAAGAAAAGTTT  
GAGAAAAGAGGCTCTCAAGCAACAAATATAACA ACTAGTGCAGAAAAGGT  
TAGGAAAATCAGCAGAGAAGACGCTCTGAAACATAAAACTAAGAACAAAG  
TGGACAATTTGGTATATGTTACTACTTTTCACAACAGAGTT

**The partial LINE-1 ORF1 cDNA sequence (Clone #7-10)**

AGGATTGGGACCACGGAGGATGAAGTACATGTGCTCCAGGGCACGGGCTC  
TAACCTGGTGCGTGATATGAAACAGATCAAAGCGAAGTGC GACGATTTAG  
AGTCCAGATCCCGCAGGAACAATATTCGCATTGTGGGGGTTCCGGAGGCG  
GCCCTCAAGGGCAAGATGGAACCTCGCTGTTGAGACCCCTTCTGAAGGACCT  
CCTGGGAGATCCCCAACTCTCCCCGTTCTTCACCATTGAGCGCGCCCATC  
GCTCACTTGCCCCGCGCCCCAAGCTGGGGGACTTCCCTAGACCAATTATA  
GCCAAGGTCCTCAGCTTCCGGGATAGAGACCACATCCTACGCC TAGCCCG  
CCTTTTTCGGTCAATGTCCAAATGGAGCGCAGACAATTTAATGGTGTAAAG  
AAAATGCTTAGAGAAAGGAAAGGGGAATACGCTATGCTGTTCCGCGCAAG  
GCTGAAGCTCACCCATCGTAATAAACTGTACTTTTTTCACGGTCCCTGAGG  
AGGCAGTGAAATTTATTGAATCTCATATTCCTATCCCTGGTCCGGCGGAC  
AACCTGGTGGAGGAGGGTTGAGTCGC

**The partial LINE-1 ORF2 cDNA sequence (Clone #6-5)**

GCGATGACAGAGGGGGAGTGGAAATAGCGCTTGCATTCCCCAAAGAGGTGT  
CCAGAAATCATAGATTCCGACAAATACAGATGAATGTGTTGCACCGAACC  
TACCTAACCCCGAAACGAATAGCTAAGTTTAACAAACAAGTGCAGTCACA  
CTGCACCTGGTGCATGAGGGAGGAAGCGGATCTAACCCACATGATGTGGG  
AATGCCCCAAGTCTAGGACGCTGTGGGATAGGGTAAAACAGACATGCGAG  
AAAACAGGCATGACCAACTACAAATGGACACCTGAGGAATGCCTACTGGG  
AATCTATCCTAGGTTAGCCAAACTGAAACACATAGTCAGGCTTATGGACA  
TAACGTGCATACTGGCCAAAAGAACCATAGCCATGTCTGGAAAAGACCC  
GCAGGACCACAATACAAAGCATGGCACAGTGAAACAGAGCGATG

For Peer Review

## Supplemental Fig. S2

### The primers used for genomic DNA PCR:

The primer derived from one of the putative LINE-1 ORF-2 piRNAs listed in Fig. 4 (the 25<sup>th</sup> small RNA from the top of the list). The sequence of the small RNA is:

**GCCCAGTAGGCATTCCTTGGGTGTCCACTCGT**. The sequence of the primer (P25R) used in the genomic DNA PCR is the fragment from the 2<sup>nd</sup> base to the 27<sup>th</sup> base of this small RNA since this portion aligns with only 2 mismatches with its putative template, LINE-1 ORF-2 clone #6-5 shown in Supplemental Fig. S1: **CCCAGTAGGCATTCCTTGGGTGTCCA**.

The LINE-1 ORF-2-specific primer (P25F/26) derived from the partial ORF-2 cDNA sequence (clone #6-5):  
**GCGCTTGCATTCCCCAAAGAGGTGT**.

The LINE-1 ORF-2 cDNA sequence between these 2 primers, P25R and P25F/26 is 275 bases. It's a partial fragment of clone #6-5 we originally identified. The sequence of this partial clone #6-5 between P25R and P25F/26 is (the fragments corresponding to the 2 primers are in bold):

**GCGCTTGCATTCCCCAAAGAGGTGT**CCAGAAATCATAGATTCCGACAAAT  
ACAGATGAATGTGTTGCACCGAACCTACCTAACCCCGAAACGAATAGCTA  
AGTTTAACAAACAAGTGCAGTCACACTGCACCTGGTGCATGAGGGAGGAA  
GCGGATCTAACCACATGATGTGGGAATGCCCAAGTCTAGGACGCTGTG  
GGATAGGGTAAACAGACATGCGAGAAAACAGGCATGACCAACTACAAAT  
**GGACACCTGAGGAATGCCTACTGGG**

The 3 scrambled primers: **GACTACAAAGACGATGACGACAAGGTG**; **ACC**  
**ATGTACCCATACGATGTTCCAGATTAC**; **GCATCAATGCAGAAGCTGATCTCAGAG**  
**GAGGAC**

The DNA sequences of 3 different clones directly cloned from the genomic DNA PCR products primed by P25R and P25F/26 (the fragments of the 2 primers are in bold upper capital letters; the bases between the primers that are different from those in clone #6-5 represent LINE-1 genomic polymorphism and are underlined in bold lower capitals):

**Clone #1:**

**GCGCTTGCATTCCCCAAAGAGGTGTCCAGAAATCATAGATTCCGACAAATACAGATGAA**  
**TGTGTTGCACCGAACCTACCTAACCCCGAAACGAATAGCTAAaTTTAAACAACAAGcGC**  
**AGTCAaACTGCACCTGGTGCATGAGGGAGGAAGCaGATCTAAtCCACATGATGTGGGAA**  
**TGtCCCAaaCTAaGACGCTGTGGGATAaGGTgAAACAGACATGCGAGAAAACAGGCAT**  
**GACCAACTACAAATGGACACCCAAGGAATGCCTACTGGG**

**Clone #2:**

**GCGCTTGCATTCCCCAAAGAGGTGTcAGAAAcCATAGATTCCGACAAATACAGATGAA**  
**TGTGTTGCACCGAACCTACCTAACCCCGAAACGAATAGCcAAaTTTAAcTAACAAGaaC**  
**AGTCAaACTGCACCTGGTGCATGAGGGAGGAAGCaGATCTAAtCCACATGATGTGGGAA**  
**TGCCCCAAGaCTAaGACGCTGTGGGATAtGGTAAACAGACATGtGAGAAAACAGGCAT**  
**GACCAACTACAAATGGACACCCAAGGAATGCCTACTGGG**

**Clone #3:**

**GCGCTTGCATTCCCCAAAGAGGTGTcAGAAAcCATAGATTCCGACAAtTACAGATcAA**  
**TGTGTTGCACCGAACCTACCTAACCCCGAAACGAATAGCcAAaTTTAAACAACAAGcGC**  
**AGTCAaACTGCACCTGGTGCATGAaGGAGGAAGCaGATCTAAtCCACATGATGTGGaAA**  
**TGtCCCAaaCTAaGACGCTGTGGGATAaGGTgAAAcgGACATGCGAGAAAACAGGCAT**  
**GACCAAtTACAAATGGACACCCAAGGAATGCCTACTGGG**

**Alignment of these 3 clones with the corresponding portion**  
**in LINE-1 ORF-2 cDNA Clone #6-5 (the polymorphic**  
**nucleotides found in these DNA fragments are highlighted in**  
**bold):**

|          |                                                              |    |
|----------|--------------------------------------------------------------|----|
| Clone1   | GCGCTTGCATTCCCCAAAGAGGTGTCCAGAAATCATAGATTCCGACAAATACAGATGAAT | 60 |
| Clone2   | GCGCTTGCATTCCCCAAAGAGGTGTCAAGAAACCATAGATTCCGACAAATACAGATGAAT | 60 |
| Clone3   | GCGCTTGCATTCCCCAAAGAGGTGTCAAGAAACCATAGATTCCGACAAATACAGATCAAT | 60 |
| ORF2cDNA | GCGCTTGCATTCCCCAAAGAGGTGTCCAGAAATCATAGATTCCGACAAATACAGATGAAT | 60 |
|          | *****                                                        |    |

|          |                                                              |     |
|----------|--------------------------------------------------------------|-----|
| Clone1   | GTGTTGCACCGAACCTACCTAACCCCGAAACGAATAGCTAAATTTAAACAACAAGCGCAG | 120 |
| Clone2   | GTGTTGCACCGAACCTACCTAACCCCGAAACGAATAGCCAAATTTAACTAACAAGAACAG | 120 |
| Clone3   | GTGTTGCACCGAACCTACCTAACCCCGAAACGAATAGCCAAATTTAAACAACAAGCGCAG | 120 |
| ORF2cDNA | GTGTTGCACCGAACCTACCTAACCCCGAAACGAATAGCTAAGTTTAAACAACAAGTGCAG | 120 |
|          | *****                                                        |     |

|          |                                                               |     |
|----------|---------------------------------------------------------------|-----|
| Clone1   | TCAAACCTGCACCTGGTGCATGAGGGAGGAAGCAGATCTAATCCACATGATGTGGGAATGT | 180 |
| Clone2   | TCAAACCTGCACCTGGTGCATGAGGGAGGAAGCAGATCTAATCCACATGATGTGGGAATGC | 180 |
| Clone3   | TCAAACCTGCACCTGGTGCATGAAGGAGGAAGCAGATCTAATCCACATGATGTGGAAATGT | 180 |
| ORF2cDNA | TCAACACTGCACCTGGTGCATGAGGGAGGAAGCGGATCTAACCACATGATGTGGGAATGC  | 180 |
|          | ***                                                           |     |

|          |                                                              |     |
|----------|--------------------------------------------------------------|-----|
| Clone1   | CCCAAACTAAGACGCTGTGGGATAAGGTGAAACAGACATGCGAGAAAACAGGCATGACC  | 240 |
| Clone2   | CCCAAGACTAAGACGCTGTGGGATATGGTAAAACAGACATGTGAGAAAACAGGCATGACC | 240 |
| Clone3   | CCCAAACTAAGACGCTGTGGGATAAGGTGAAACGGACATGCGAGAAAACAGGCATGACC  | 240 |
| ORF2cDNA | CCCAAGTCTAGACGCTGTGGGATAGGGTAAAACAGACATGCGAGAAAACAGGCATGACC  | 240 |
|          | *****                                                        |     |

1  
2  
3  
4  
5  
6 Clone1 AACTACAAATGGACACCC**CA**AGGAATGCCTACTGGG 275  
7 Clone2 AACTACAAATGGACACCC**CA**AGGAATGCCTACTGGG 275  
8 Clone3 AAT**T**ACAAATGGACACCC**CA**AGGAATGCCTACTGGG 275  
9 ORF2cDNA AACTACAAATGGACACCT**G**AGGAATGCCTACTGGG 275  
10 \*\* \*\*\*\*\*  
11  
12  
13  
14  
15  
16  
17  
18  
19  
20  
21  
22  
23  
24  
25  
26  
27  
28  
29  
30  
31  
32  
33  
34  
35  
36  
37  
38  
39  
40  
41  
42  
43  
44  
45  
46  
47  
48  
49  
50  
51  
52  
53  
54  
55  
56  
57  
58  
59  
60

For Peer Review

## Supplemental Fig.S3

### Table 1

| Cluster ID              | Best hit  | Gene      | NR5<br>454 | DL5<br>454 | NR14<br>454 | DL14<br>454 | CTL<br>454 | Function             |
|-------------------------|-----------|-----------|------------|------------|-------------|-------------|------------|----------------------|
| Cluster_218328_Contig1  | XP_945963 | LOC651665 | 0.0        | 0.0        | 12.9        | 0.0         | 0.0        | retrotransposon-like |
| Cluster_154450_Contig16 | XP_945963 | LOC651665 | 4.8        | 27.4       | 11.5        | 2.0         | 9.8        | retrotransposon-like |
| Cluster_217452_Contig1  | XP_935194 | LOC647087 | 0.0        | 2.5        | 8.6         | 0.0         | 15.7       | retrotransposon-like |
| Cluster_193687_Contig1  | XP_931431 | LOC642956 | 69.3       | 74.7       | 75.9        | 68.0        | 9.8        | retrotransposon-like |
| Cluster_193687_Contig8  | XP_931431 | LOC642956 | 21.5       | 2.5        | 22.9        | 10.0        | 2.0        | retrotransposon-like |
| Cluster_323661_Contig38 | XP_931247 | LOC642707 | 40.6       | 17.4       | 51.6        | 26.0        | 0.0        | retrotransposon-like |
| Cluster_10953_Contig8   | NP_055405 | ERVWE1    | 4.8        | 14.9       | 0.0         | 1.0         | 0.0        | retroviral component |
| Cluster_42238_Contig456 | NP_055883 | PEG10     | 40.6       | 2.5        | 10.0        | 3.0         | 11.8       | retrovirus-like      |
| Cluster_42238_Contig60  | NP_055883 | PEG10     | 7.2        | 34.9       | 37.3        | 10.0        | 27.5       | retrovirus-like      |

Table 2

| <i>Ambystoma</i><br><i>Contig</i> | <i>Annotation</i>                                                                                              | <i>amby</i><br><i>seq</i><br><i>Start</i> | <i>end</i> | <i>subject</i><br><i>seq</i><br><i>start</i> | <i>end</i> | <i>e-value</i> |
|-----------------------------------|----------------------------------------------------------------------------------------------------------------|-------------------------------------------|------------|----------------------------------------------|------------|----------------|
| Mex_Nohits_1286_Contig_1          | gi 41203814 ref XP_370776.1  RTL1<br>PREDICTED: similar to retrotransposon-like 1 [Homo sapiens]               | 510                                       | 4          | 741                                          | 911        | 7.00E-11       |
| EPTY8IW01DWBJX                    | gi 10047124 ref NP_061333.1  RAG1AP1<br>recombination activating gene 1<br>activating protein 1 [Homo sapiens] | 243                                       | 4          | 9                                            | 88         | 4.00E-25       |
| Mex_NM_032862_Contig_1            | gi 144922631 ref NP_116251.3  tigger<br>transposable element derived 5 [Homo sapiens]                          | 380                                       | 559        | 1                                            | 60         | 2.00E-25       |
| 165619_1695_0737                  | gi 156627567 ref NP_006506.2  SET domain<br>and mariner transposase fusion [Homo sapiens]                      | 182                                       | 9          | 115                                          | 172        | 1.00E-21       |
| Cluster_25858_Contig1             | gi 25777746 ref NP_689808.2  PGBD4<br>piggyBac transposable element derived 4<br>[Homo sapiens]                | 388                                       | 2          | 446                                          | 585        | 3.00E-19       |
| EQEDK3201D8MHF                    | gi 31542663 ref NP_061952.2  ECAT11<br>LINE-1 type transposase domain containing<br>1 [Homo sapiens]           | 24                                        | 263        | 757                                          | 836        | 4.00E-09       |
| EPTY8IW01CSQVN                    | gi 46397390 ref NP_055915.2  POGZ pogo<br>transposable element with ZNF domain<br>isoform 1 [Homo sapiens]     | 239                                       | 3          | 1191                                         | 1269       | 4.00E-27       |
| EPTY8IW01EIT9X                    | gi 46397394 ref NP_997054.1  POGZ pogo<br>transposable element with ZNF domain<br>isoform 2 [Homo sapiens]     | 2                                         | 250        | 78                                           | 151        | 3.00E-27       |
| Cluster_401840_Contig1            | gi 4759258 ref NP_004720.1  DHRSX Ac-<br>like transposable element [Homo sapiens]                              | 2                                         | 259        | 591                                          | 676        | 2.00E-29       |
| Cluster_42238_Contig386           | gi 89037862 ref XP_945963.1  LOC651665<br>PREDICTED: similar to retrotransposon-like 1 [Homo sapiens]          | 87                                        | 905        | 633                                          | 907        | 5.00E-36       |
